# Supplementary material
Source: MDPI journal article supplement (https://www.mdpi.com/2073-4344/13/1/62)
Supplement: s1 [file s1]

# **Supplementary Material**

**Optimized Conditions for Preparing a Heterogeneous Biocatalyst  
Via Cross-Linked Enzyme Aggregates (CLEAs) of  $\beta$ -Glucosidase  
from *Aspergillus niger***

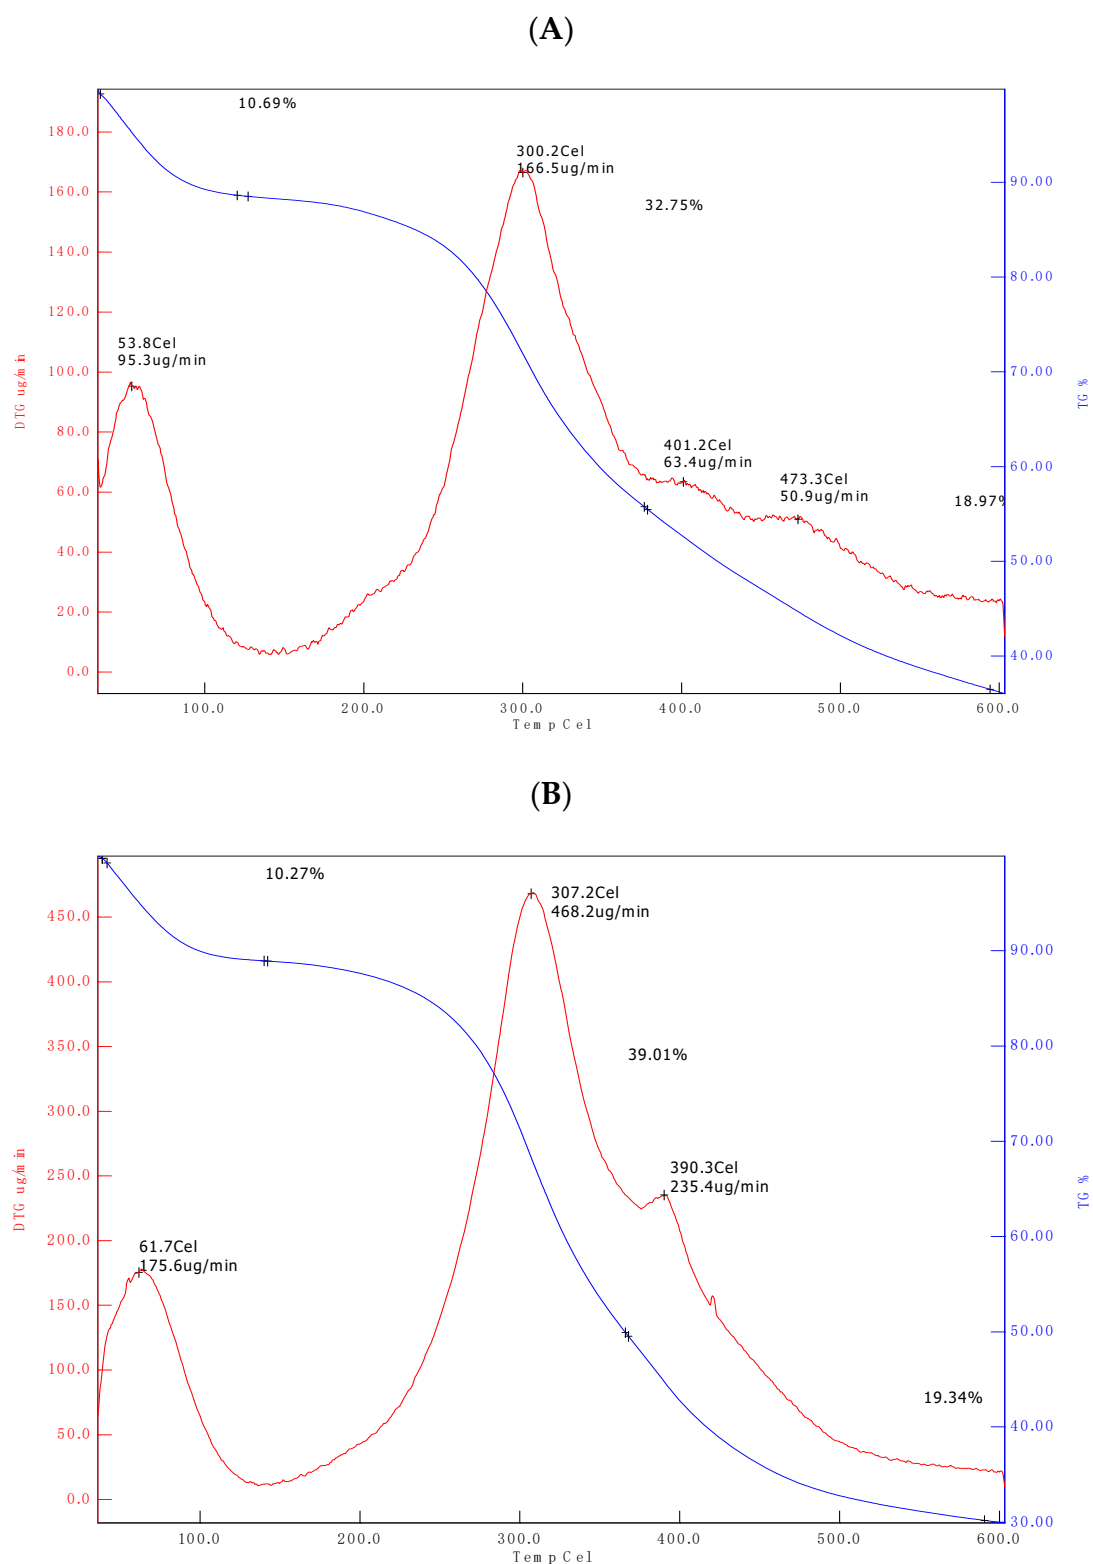

**Figure S1.** TG (blue curves) and DTG (red curves) analyses for soluble (A) and immobilized (B)  $\beta$ -glucosidase.

(A)

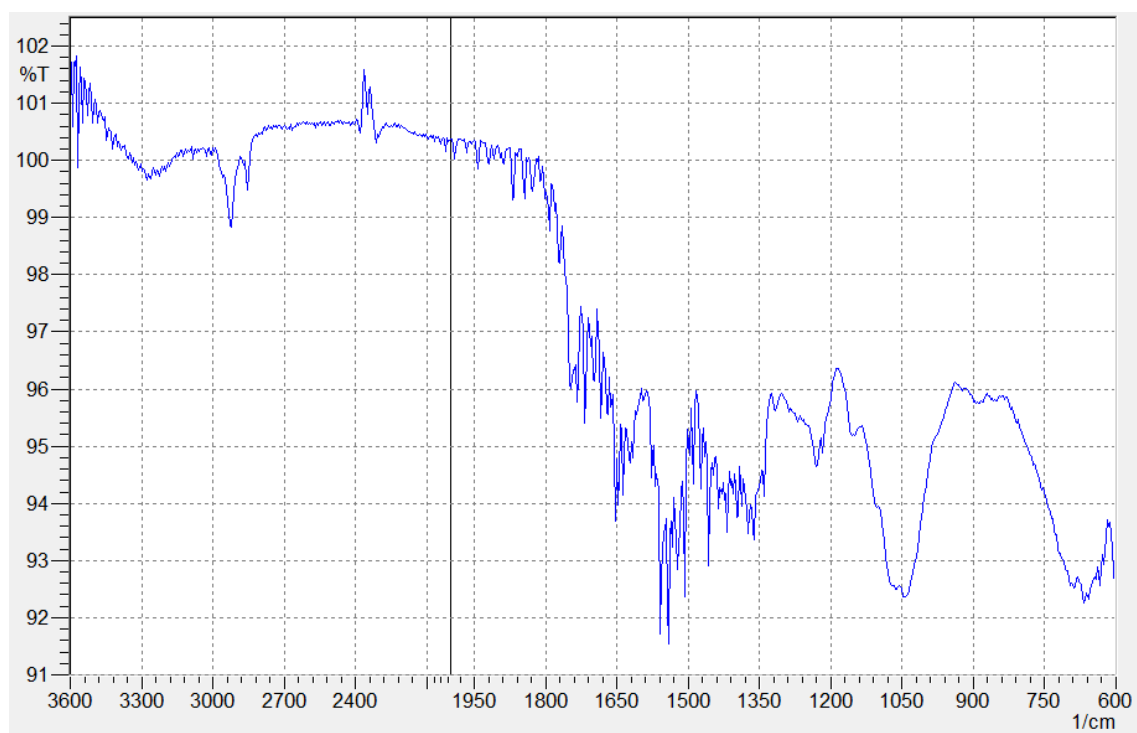

(B)

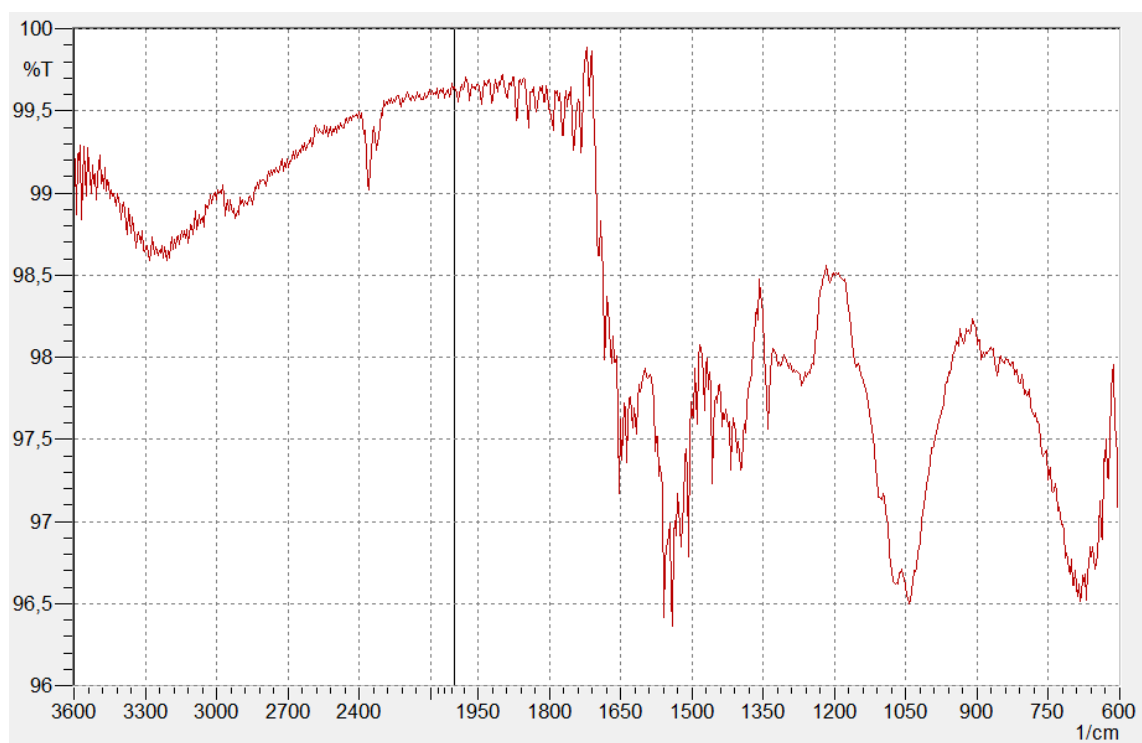

**Figure S2.** FT-IR analysis for (A) and immobilized (B)  $\beta$ -glucosidase.
